# Supplementary material for: RuIII(EDTA) mediated S-nitrosylation of cysteine by nitrite
Source: Royal Society of Chemistry journal article supplement (doi:10.1039/c4dt02628d), 2014-10-06
Supplement: c4dt02628d1.pdf [file c4dt02628d1.pdf]

## Electronic Supplementary Information (ESI)

### $\text{Ru}^{\text{III}}(\text{EDTA})$ mediated S-nitrosylation of cysteine with nitrite

Debabrata Chatterjee,\* Namita Jaiswal, Matthias Schmeisser and Rudi van Eldik\*

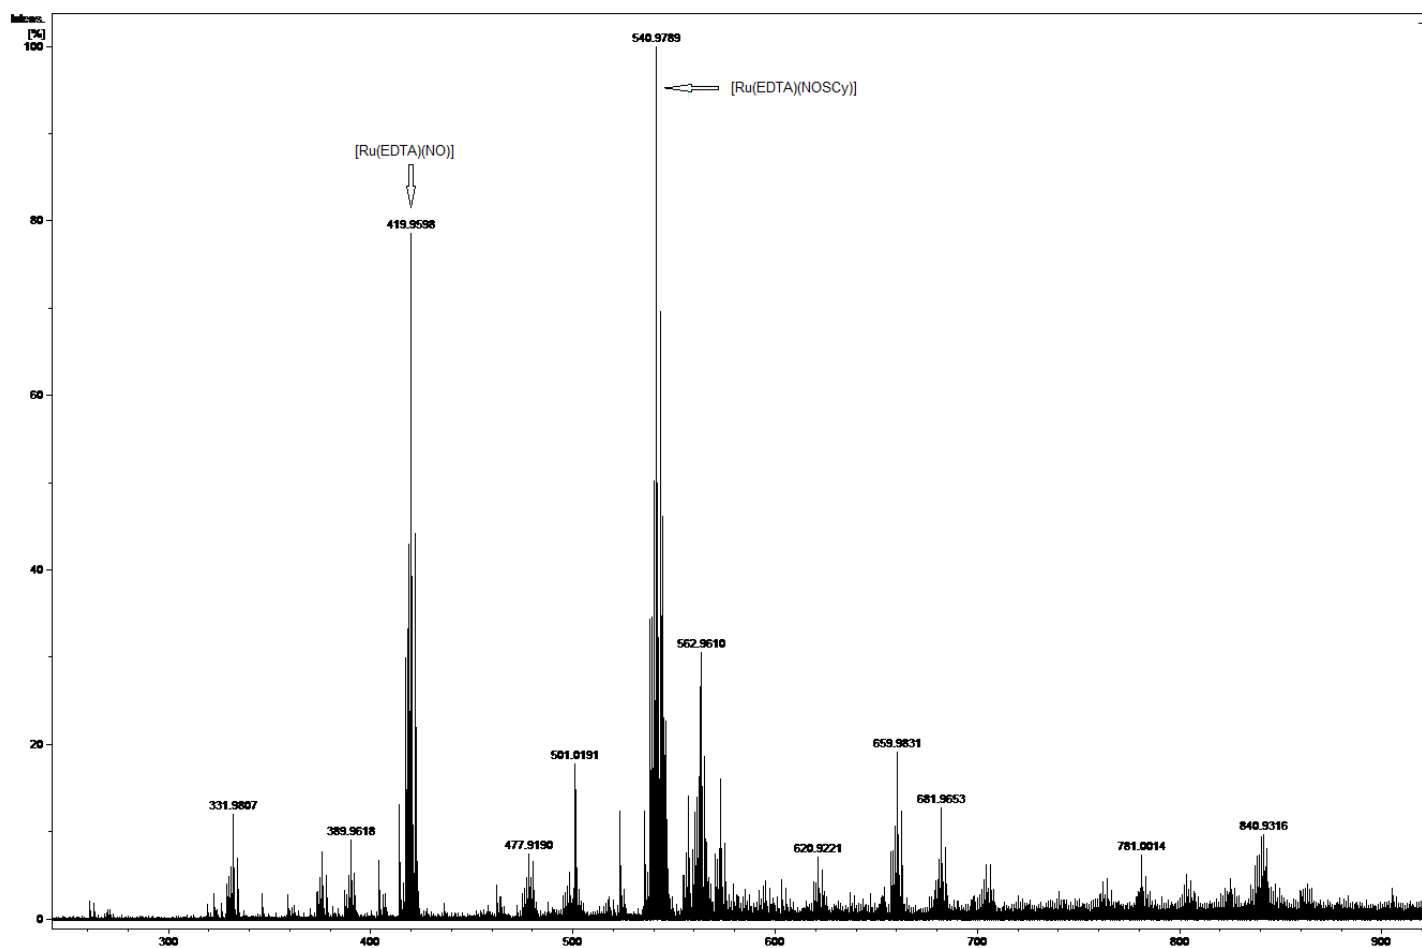

**Figure S1.** ESI-MS spectra indicating the formation of  $[\text{Ru}^{\text{III}}(\text{EDTA})(\text{NO})]$  and  $[\text{Ru}^{\text{III}}(\text{EDTA})(\text{SNOCy})]^-$  in the reaction of  $[\text{Ru}^{\text{III}}(\text{EDTA})(\text{CyS})]^{2-}$  (preformed by reacting the  $[\text{Ru}(\text{EDTA})(\text{H}_2\text{O})]^-$  (0.2 mM) with cysteine (0.2 mM) in 10 mM acetate buffer at pH = 4.5.
